# Supplementary material
Source: ML conference proceedings conference paper supplement (https://openaccess.thecvf.com/content/CVPR2026/html/Ma_DeCo_Frequency-Decoupled_Pixel_CVPR_2026_paper.html)
Supplement: Supplementary file 1 [file Ma_DeCo_Frequency-Decoupled_Pixel_CVPR_2026_supplemental.pdf]

# DeCo: Frequency-Decoupled Pixel Diffusion for End-to-End Image Generation

## Supplementary Material

### A. Comparison with JiT

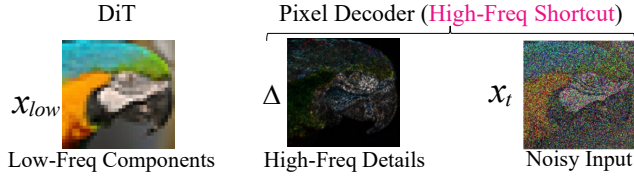

Figure 7. Comparison with JiT.

The key idea of DeCo is to provide a **high-freq shortcut via the pixel decoder**, enabling an implicit frequency decoupling. High-freq components include noisy input  $x_t$  and high-freq details  $\Delta$ . In standard DiTs, high-freq signals tend to be suppressed after the patchification and deep transformer layers. Since pixel decoder directly models each pixel of the raw input, DeCo can automatically use this high-freq shortcut and offload high-freq modeling to pixel decoder, enabling DiT to focus on low-freq components  $x_{low}$ . Unlike JiT, which explicitly predicts  $x_0 = x_{low} + \Delta$ , our DiT implicitly models  $x_{low}$ , excluding hard high-freq details  $\Delta$ . The pixel decoder, guided by  $x_{low}$ , only needs to fit a simple JiT-style formulation  $v_\theta = \frac{x_{low} + (\Delta - x_t)}{t}$ . This separation is learned end-to-end. Visualization in Fig. 2(c), spectrum analysis in Fig. 4, and superior performance over “JiT+REPA” in Tab. 1 validate our implicit decoupling.

### B. Implementary Details

#### B.1. Baseline Comparisons

In this subsection, we summarize the settings used for all baseline comparisons. In the baseline comparisons, all diffusion models are trained on ImageNet at  $256 \times 256$  resolution for 200k iterations using a large DiT variant. Following previous works [44, 66], we use a global batch size of 256 and the AdamW optimizer with a constant learning rate of  $1e-4$ . Both baseline and DeCo adopt SwiGLU [59, 60], RoPE2d [53], and RMSNorm, and are trained with lognorm sampling and REPA [77]. The patch size of DiT’s input is set to 16 for both baseline and our DeCo. The patch size of pixel decoder is set to 1. Our main architectural change on the baseline is to replace the final two DiT blocks of the baseline with our proposed pixel decoder.

For inference, we use 50 Euler steps without classifier-free guidance [18] (CFG) for all models except PixelFlow [6], which requires 100 steps. We also report results for the two-stage DiT-L/2 that requires a VAE and the recent pixel diffusion models PixelFlow [6] and PixNerd [66]. For a fair comparison, we further integrate DDT [67] into the pixel diffusion to form PixDDT, which has the simi-

lar parameter counts and computation FLOPs to our DeCo. Training memory and speed are measured with batch size of 256 on  $8 \times A800$  GPUs, while inference memory and time are measured on a single A800 with batch size of 1.

#### B.2. Class-to-Image Generation

For class-to-image generation experiments on ImageNet, we first train the model at a  $256 \times 256$  resolution for 320 epochs. Subsequently, we fine-tune the model for additional 20 epochs at a  $512 \times 512$  resolution. During inference, we use 100 Euler steps with CFG [18] and guidance interval [28]. Inference latency is measured on a single A800 GPU. The batch size and learning rate follow the default settings previously described. We use a global batch size of 256 and the AdamW optimizer with a constant learning rate of  $1e-4$ . We set the CFG scale to 3.2 for the  $256 \times 256$  resolution (320 epochs) and 5.0 for the  $512 \times 512$  resolution (340 epochs). The CFG scale is set to 3.0 for the model of 800 epochs at a  $256 \times 256$  resolution. The guidance interval [28] is set to 0.1 following previous work [66].

#### B.3. Text-to-Image Generation

For text-to-image generation, we trained our model on the BLIP3o [5] dataset, which contains approximately 36M pretraining images and 60k high-quality instruction-tuning data. We adopt Qwen3-1.7B [75] as the text encoder. The entire training takes about 6 days on  $8 \times H800$  GPUs. We adopt Qwen3-1.7B [75] as the text encoder. To improve the alignment of frozen text features [12], we jointly train several transformer layers on the frozen text features similar to Fluid [12]. The total batch size is 1536 for  $256 \times 256$  resolution pretraining and 512 for  $512 \times 512$  resolution pretraining. Following PixNerd [66], we pretrain DeCo on  $256 \times 256$  resolution for 200K steps and pretrain on  $512 \times 512$  resolution for 80K steps. We further fine-tune the pretrained DeCo on BLIP3o-60k with 40k steps at the  $512 \times 512$  resolution following PixNerd. We adopt the gradient clip to stabilize training. *The whole training only takes about 6 days on  $8 \times H800$  GPUs.* We use the Adams-2nd solver with 25 steps as the default choice for sampling. The cfg scale is set to 4.0. We leave the native resolution [69] or native aspect training [13, 15, 34] as future works.

#### B.4. Experiment Configurations

Table 5 summarizes the experiment configurations for DeCo-L/16, DeCo-XL/16, and DeCo-XXL/16. In practice, we follow the training setups from previous works such as DiT [44], SiT [38], and PixNerd [66]. Besides, we sweep

|                     | DeCo-L                                                                 | DeCo-XL | DeCo-XXL |
|---------------------|------------------------------------------------------------------------|---------|----------|
| <b>architecture</b> |                                                                        |         |          |
| DiT depth           | 22                                                                     | 28      | 16       |
| hidden dim          | 1024                                                                   | 1152    | 1536     |
| heads               | 16                                                                     | 16      | 24       |
| params              | 426M                                                                   | 682M    | 1.1B     |
| decoder depth       |                                                                        | 3       |          |
| decoder hidden dim  |                                                                        | 32      |          |
| patch size          |                                                                        | 16      |          |
| image size          | 256 (other settings: 512)                                              |         |          |
| <b>training</b>     |                                                                        |         |          |
| optimizer           | AdamW [36], $\beta_1, \beta_2 = 0.9, 0.999$                            |         |          |
| batch size          | 256                                                                    |         |          |
| learning rate       | 1e-4                                                                   |         |          |
| lr schedule         | constant                                                               |         |          |
| weight decay        | 0                                                                      |         |          |
| ema decay           | 0.9999                                                                 |         |          |
| time sampler        | $\text{logit}(t) \sim \mathcal{N}(\mu, \sigma^2), \mu = 0, \sigma = 1$ |         |          |
| noise scale         | 1.0                                                                    |         |          |
| <b>sampling</b>     |                                                                        |         |          |
| ODE solver          | Euler                                                                  |         |          |
| ODE steps           | 100                                                                    |         |          |
| time steps          | linear in [0.0, 1.0]                                                   |         |          |
| CFG scale range     | [3.0-3.2] (256×256), [4.5-5.0] (512×512)                               |         |          |
| CFG interval [28]   | [0.1, 1]                                                               |         |          |

Table 5. Configurations of experiments.

the CFG scale within the given ranges using an interval of 0.1.

### C. Text-to-Image Prompts

Below, we list the prompts used for text-to-image generation in Fig. 1. These prompts cover a mix of animals, people, and scenes to evaluate semantic understanding and visual detail generation.

- A lovely horse stands in the bedroom.
- A baby cat stands on two legs, wearing a chothes.
- A cyberpunk woman with glowing tattoos and a mechanical arm beneath a holographic sky.
- A man sipping coffee on a sunny balcony filled with potted plants, wearing linen clothes and sunglasses, basking in the morning light.
- A beautiful woman.
- A cute panda is wielding a sword in realistic style.
- An extremely happy American Cocker Spaniel is smiling and looking up at the camera with his head tilted to one side.
- A raccoon wearing a detective’s hat, observing something with a magnifying glass.
- Close-up of an aged man with weathered features and sharp blue eyes peering wisely from beneath a tweed flat cap.

### D. Quantization Tables

In our DeCo, we use the normalized reciprocal of scaled JPEG quantization tables as adaptive weights to emphasize different frequency components. These tables are a core component of the JPEG compression standard and are designed based on properties of the human visual system (HVS) [45].

As shown in Sec. 3.3, a quantization table is an  $8 \times 8$  matrix that determines the compression level for each frequency coefficient after the Discrete Cosine Transform (DCT). The JPEG standard uses two separate tables: one for the luminance (Y) component and another for the chrominance (Cb/Cr) components. This design is based on key characteristics of human perception. The core principle is that the human eye is not equally sensitive to all visual information. Specifically, two HVS properties are crucial. Firstly, the human eye is much more sensitive to low-frequency components than to high-frequency components. Secondly, the eye is more sensitive to changes in brightness (luminance) than in color (chrominance) [45].

Based on extensive experiments, the standard base quantization tables  $Q_{\text{base}}$  in Fig. 8 were developed to reflect these properties [45]. These tables have smaller values (finer quantization intervals) for low-frequency coefficients, which are perceptually more important. Conversely, these tables have larger values (coarser quantization intervals) for high-frequency coefficients, as the resulting information loss is less noticeable to the human eye. Similarly, the luminance table generally has smaller values than the chrominance table. These base tables can be scaled using a quality factor  $q$  to create new scaled quantization tables  $Q_{\text{cur}}$  for different compression levels.

Since a smaller quantization step implies that a frequency component is more significant to human perception, we use the normalized reciprocal of the scaled quantization tables as adaptive weights, i.e.,  $\frac{1}{Q_{\text{cur}}}$  with normalization. This allows us to assign a higher weight to the frequency components that are visually more important in our frequency-aware flow-matching loss  $\mathcal{L}_{\text{FreqFM}}$ .

### E. Pseudocodes for DeCo

#### E.1. Training Step of DeCo

In Algorithm 1, we provide the pseudocodes for the training step of DeCo. DeCo utilizes the DiT to specialize in low-frequency semantic modeling with downsampled small-scale inputs  $\bar{x}_t$ . Semantic cues  $c$  are hence incorporated with a lightweight pixel decoder to reconstruct high-frequency signals. In other words, the pixel decoder takes the low-frequency semantics  $c$  from DiT as condition and predicts pixel velocities  $v_\theta$  with a high-resolution input  $x_t$ . This new paradigm hence frees the DiT to specialize in

| Base Luminance (Y) |    |    |    |     |     |     |     | Base Chrominance (Cb/Cr) |    |    |    |    |    |    |    |
|--------------------|----|----|----|-----|-----|-----|-----|--------------------------|----|----|----|----|----|----|----|
| 16                 | 11 | 10 | 16 | 24  | 40  | 51  | 61  | 17                       | 18 | 24 | 47 | 99 | 99 | 99 | 99 |
| 12                 | 12 | 14 | 19 | 26  | 58  | 60  | 55  | 18                       | 21 | 26 | 66 | 99 | 99 | 99 | 99 |
| 14                 | 13 | 16 | 24 | 40  | 57  | 69  | 56  | 24                       | 26 | 56 | 99 | 99 | 99 | 99 | 99 |
| 14                 | 17 | 22 | 29 | 51  | 87  | 80  | 62  | 47                       | 66 | 99 | 99 | 99 | 99 | 99 | 99 |
| 18                 | 22 | 37 | 56 | 68  | 109 | 103 | 77  | 99                       | 99 | 99 | 99 | 99 | 99 | 99 | 99 |
| 24                 | 35 | 55 | 64 | 81  | 104 | 113 | 92  | 99                       | 99 | 99 | 99 | 99 | 99 | 99 | 99 |
| 49                 | 64 | 78 | 87 | 103 | 121 | 120 | 101 | 99                       | 99 | 99 | 99 | 99 | 99 | 99 | 99 |
| 72                 | 92 | 95 | 98 | 112 | 100 | 103 | 99  | 99                       | 99 | 99 | 99 | 99 | 99 | 99 | 99 |

Base Quantization Tables  $Q_{base}$

| Scaled Luminance (Y) |    |    |    |    |    |    |    | Scaled Chrominance (Cb/Cr) |    |    |    |    |    |    |    |
|----------------------|----|----|----|----|----|----|----|----------------------------|----|----|----|----|----|----|----|
| 5                    | 3  | 3  | 5  | 7  | 12 | 15 | 18 | 5                          | 5  | 7  | 14 | 30 | 30 | 30 | 30 |
| 4                    | 4  | 4  | 6  | 8  | 17 | 18 | 16 | 5                          | 6  | 8  | 20 | 30 | 30 | 30 | 30 |
| 4                    | 4  | 5  | 7  | 12 | 17 | 20 | 17 | 7                          | 8  | 17 | 30 | 30 | 30 | 30 | 30 |
| 4                    | 5  | 7  | 9  | 15 | 26 | 24 | 18 | 14                         | 20 | 30 | 30 | 30 | 30 | 30 | 30 |
| 5                    | 7  | 11 | 17 | 20 | 32 | 31 | 23 | 30                         | 30 | 30 | 30 | 30 | 30 | 30 | 30 |
| 7                    | 10 | 16 | 19 | 24 | 31 | 34 | 27 | 30                         | 30 | 30 | 30 | 30 | 30 | 30 | 30 |
| 15                   | 19 | 23 | 26 | 31 | 36 | 36 | 30 | 30                         | 30 | 30 | 30 | 30 | 30 | 30 | 30 |
| 21                   | 27 | 28 | 29 | 33 | 30 | 31 | 29 | 30                         | 30 | 30 | 30 | 30 | 30 | 30 | 30 |

Scaled Quantization Tables in Quality 85  $Q_{cur}$

Figure 8. Base and Scaled Quantization Tables.

---

### Algorithm 1 Training step

---

```

#  $\theta_{DiT}$ : DiT network
#  $\theta_{Dec}$ : Pixel Decoder network
#  $x_0$ : training batch
#  $y$ : class label or textual prompt
#  $Q_{cur}$ : scaled quantization tables in quality 85.

# Prepare inputs
t = sample.t()
x1 = randn.like(x0)
xt = (1-t)x0 + tx1 # original scale
xt = patchify(xt, patch_size=16) # small-scale

# Prepare ground-truth velocities
vt = x1 - x0
Vt = DCT2D(RGB2YCbCr(vt))

# Generate low-frequency semantic condition
c =  $\theta_{DiT}(xt, t, y)$ 
# Predict velocity conditioned on c
v $\theta$  =  $\theta_{Dec}(xt, t, c)$ 
V $\theta$  = DCT2D(RGB2YCbCr(v $\theta$ ))

# Compute Loss
FM_loss = mean( $\|v\theta - vt\|^2$ )
w = 1/Qcur
w = w / w.mean() # normalized adaptive weights
FreqFM_loss = mean(w *  $\|V\theta - Vt\|^2$ )
loss = FM_loss + FreqFM_loss + REPA_loss

```

---

modeling semantics, and allows for more specialized details generation. To emphasize visually salient frequencies and suppress perceptually insignificant high-frequency components, we further introduce a frequency-aware Flow-Matching loss  $\mathcal{L}_{FreqFM}$  inspired by the JPEG [23]. A REPA [77] loss is used in both our Baseline and DeCo.

---

### Algorithm 2 K-Means Visualization in Fig. 2 (c)

---

```

# Feats: DiT outputs (T, H, W, C)
# I: generated images (T, H, W, 3)
# T: Sampling steps

for t in T:
    # Flatten spatial dimensions
    f = Feats[t].reshape(-1, C)

    # Cluster pixel-wise features
    labels = kmeans(f, n_clusters=8)

    # Map clusters to visualization
    vis = colormap(labels).reshape(H, W)

    plot(vis, I[t])

```

---



---

### Algorithm 3 DCT Spectral Analysis

---

```

# V: Predicted velocity (B * T, ori_H, ori_W, C)
# Feats: DiT outputs (B * T, H, W, C)

# Pre-compute frequency scan order
# The block size of DCT is set to 8
idx = ZigZagIndices(block_size=8)

F_energy, V_energy = 0, 0
F_num_blocks, V_num_blocks = 0, 0
for f, v in (Feats, V):
    # Split input into patches
    f_patches = Unfold(f, kernel_size=8)
    v_patches = Unfold(v, kernel_size=8)

    # 2D Discrete Cosine Transform
    f_freq = DCT2D(f_patches)
    f_energy = f_freq ** 2
    v_freq = DCT2D(v_patches)
    v_energy = v_freq ** 2

    # Accumulate energy following ZigZag order
    # Maps 2D (u,v) to 1D frequency index
    F_energy += Sum(f_energy.reorder(idx))
    F_num_blocks += len(f_patches)
    V_energy += Sum(v_energy.reorder(idx))
    V_num_blocks += len(v_patches)

# Log-scale Normalization
Feats_S = log(1 + F_energy / F_num_blocks)
Feats_S = Feats_S / max(Feats_S)
V_S = log(1 + V_energy / V_num_blocks)
V_S = V_S / max(V_S)

plot(Feats_S)
plot(V_S)

```

---

## E.2. K-Means Visualization in Fig. 2 (c)

In Algorithm 2, we provide the pseudocodes for the K-Means visualization in Fig. 2 (c). The number of clusters in K-Means is set to 8. We uniformly select 4 timesteps from the sampling process and visualize the clustering results at

these timesteps.

### E.3. DCT energy distribution in Fig. 4

In Algorithm 3, we provide the pseudocodes for DCT spectral analysis of Fig. 4. We apply an  $8 \times 8$  DCT to transform the DiT outputs and pixel velocities into frequency domain. Each  $8 \times 8$  patch yields 64 frequency coefficients, which are then converted into energy via a square operation. We reorder these energies from low to high frequency using standard zigzag indexing, where lower indices correspond to lower-frequency components. Finally, we apply log-scale normalization to rescale all energies to the range  $[0, 1]$  for comparison. As demonstrated in Fig. 4, compared with baseline, DeCo suppresses high-frequency signals in DiT outputs while preserving strong high-frequency energy in pixel velocity, confirming effective frequency decoupling. The distribution is computed on 10K images across all diffusion steps, i.e.,  $B=10,000$  and  $T=100$ .

### F. More Visualizations

In this section, we provide more visualizations, including text-to-image generation in Fig. 9, class-to-image generation at a  $256 \times 256$  resolution in Fig. 10, and class-to-image generation at a  $512 \times 512$  resolution in Fig. 11. Our DeCo supports multiple languages with the Qwen3 text encoder after pretraining on the BLIP3o dataset [5], such as Chinese, Japanese, and English.

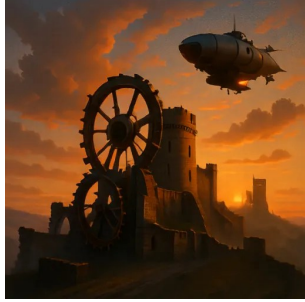

蒸汽朋克风格的长城，巨大齿轮与空中飞艇，黄昏史诗光影  
(Steampunk Great Wall with huge gears and airships, epic dusk light)

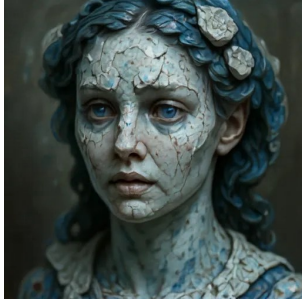

破碎的青花瓷风少女面孔，细腻纹理，超现实主义  
(Shattered blue-and-white porcelain girl's face, fine texture, surreal)

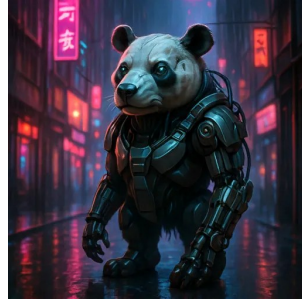

赛博朋克大熊猫，佩戴机械义肢，在霓虹街道漫步  
(Cyberpunk panda with mechanical prosthetics walking through neon streets)

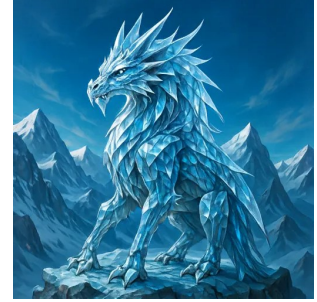

透明冰晶材质的龙，盘踞雪山之巅  
(A transparent ice-crystal dragon coiled atop a snowy peak)

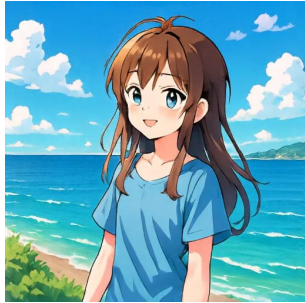

朝日を浴びる海辺の少女  
(A girl on the seaside bathed in morning light)

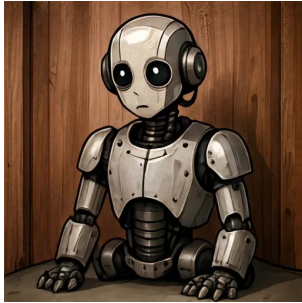

悲しいロボット  
(A sad robot)

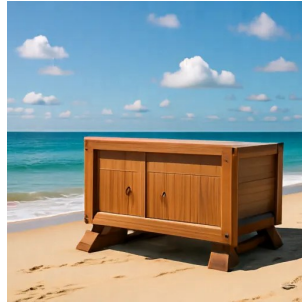

海辺に置かれた木箱  
(A wooden box placed on the seaside)

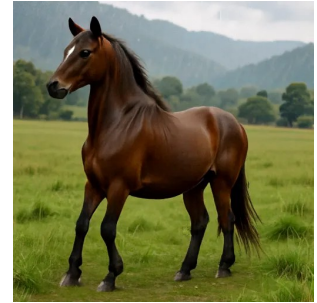

雨の草原を歩く馬  
(A horse walking on a rainy grassland)

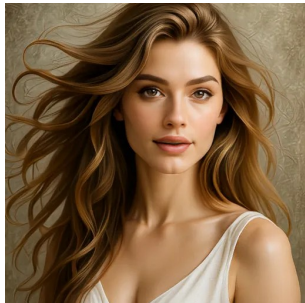

A beautiful girl with hair flowing like a cascading waterfall.

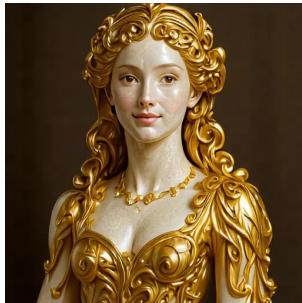

Portrait of a woman made entirely of porcelain and gold.

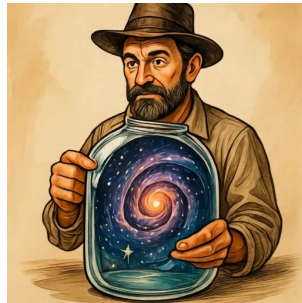

Old fisherman holding a galaxy inside a glass jar.

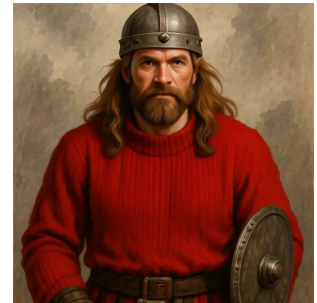

Viking warrior wearing a red sweater

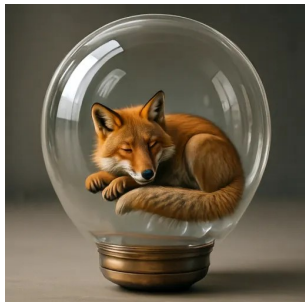

A fox sleeping inside a large transparent lightbulb

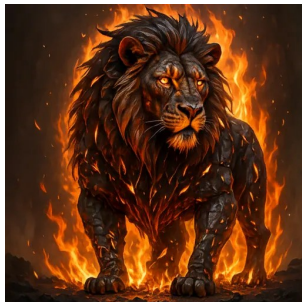

A lion made of burning charcoal and glowing embers.

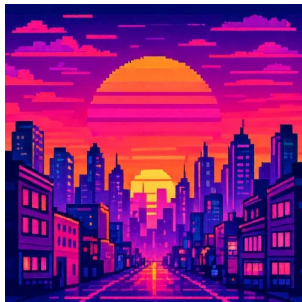

Pixel art sunset over a retro synthwave city.

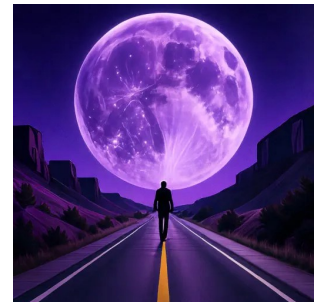

A highway leading straight into a giant purple moon with a person.

Figure 9. More Qualitative results of text-to-image generation at a 512×512 resolution. Our DeCo supports multiple languages with the Qwen3 text encoder, such as Chinese, Japanese, and English.

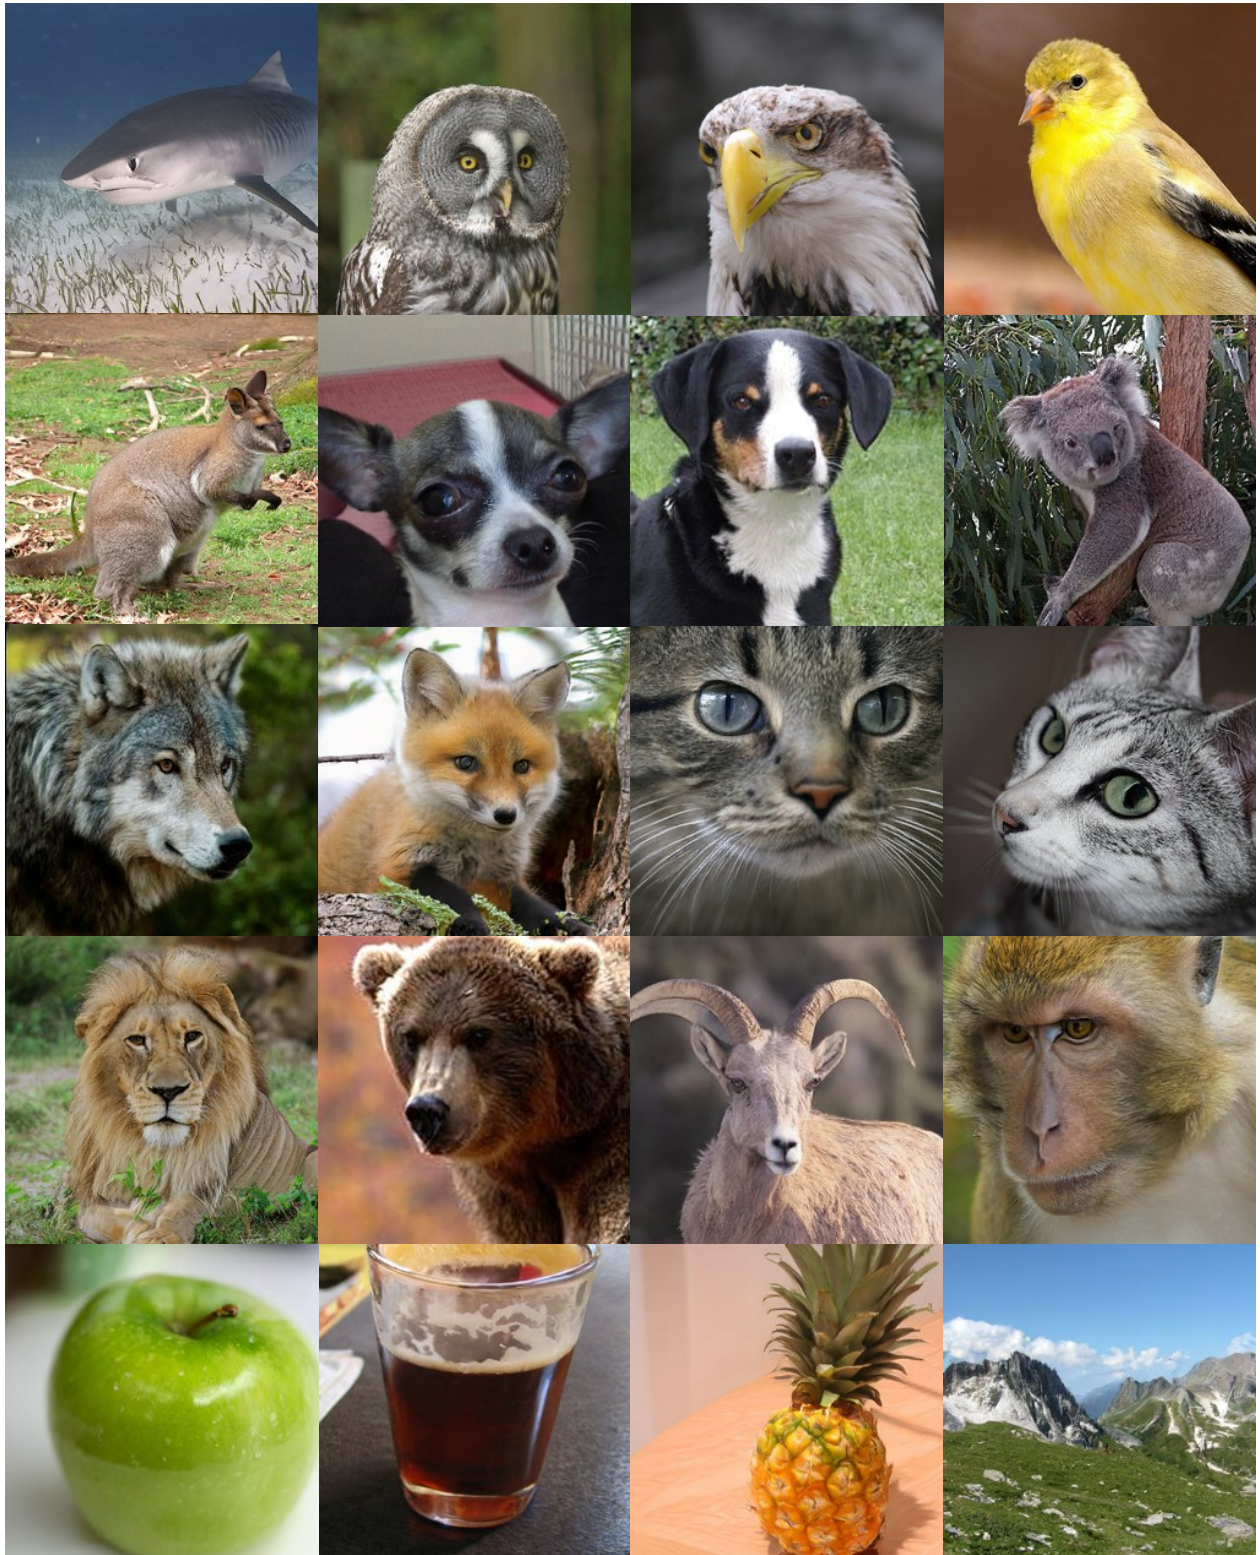

Figure 10. More qualitative results of class-to-image generation at a  $256 \times 256$  resolution.

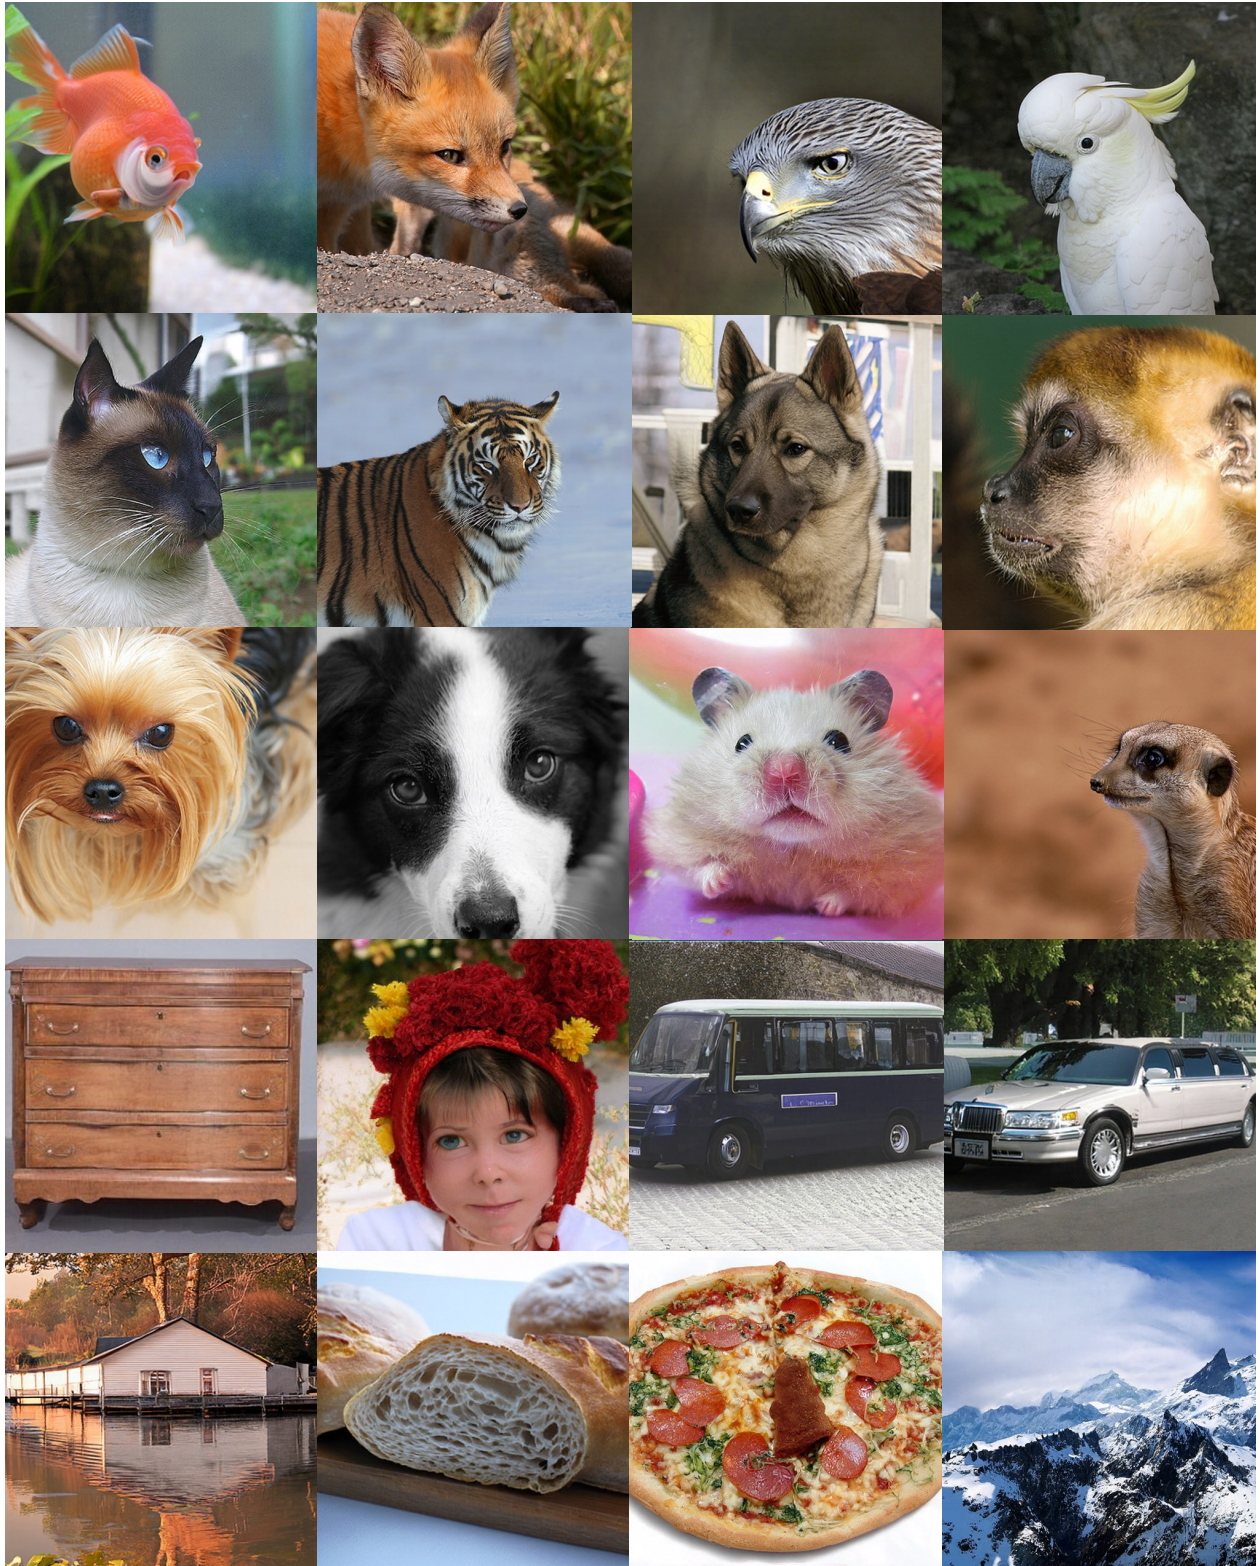

Figure 11. Qualitative results of class-to-image generation at a  $512 \times 512$  resolution.
